21 **Abstract**

22 Benevolent social behaviours, such as parental care, are predicted to relax selection against  
23 deleterious mutations, enabling them to persist. We tested this prediction experimentally  
24 using burying beetles *Nicrophorus vespilloides*, which make an edible nest for their larvae,  
25 whom they nourish and defend. For 20 generations, we allowed replicate experimental  
26 burying beetle populations to evolve either with post-hatching care ('Full Care' populations)  
27 or without it ('No Care' populations). Lineages were seeded from these experimental  
28 populations and then inbred to expose differences in their mutation load. Outbred lineages  
29 served as controls. Half the lineages received post-hatching care, half did not. We found that  
30 inbred lineages derived from the Full Care populations had lower breeding success and went  
31 extinct more quickly than lineages derived from the No Care populations – but only when  
32 offspring received no post-hatching care. We infer that Full Care lineages carried more  
33 recessive deleterious mutations. When parents provided care, the developmental environment  
34 was sufficiently benign that broods had higher survival, whether the population had a high  
35 mutation load or not. We suggest that the increased mutation load caused by parental care  
36 increases a population's dependence upon care. This could explain why care is seldom lost  
37 once it has evolved.

38

## 39 Introduction

40 Classical population genetics models imagine that populations attain an equilibrium level of  
41 genetic variation (known as mutation-selection balance [1-5]). New genetic mutations arise  
42 spontaneously, through diverse mechanisms, and increase genetic variation in the population  
43 [e.g. 5, 6]. However, since the majority of new mutations are mildly deleterious [e.g. 5, 6],  
44 they are quickly purged by natural selection. Mutation-selection balance is theoretically  
45 achieved when the rate of input of new genetic variants through spontaneous mutation is  
46 perfectly balanced by the rate of their elimination by selection [1-5].

47

48 The concept of mutation-selection balance has long been used as a theoretical reference point  
49 for understanding the effects of mutation rate on the health of human populations, partly  
50 because it is recognised that humans can modify their own environment and so change the  
51 forces of natural selection to which they are exposed [1-5]. Better quality housing, improved  
52 diets, and benevolent social activities, such as a welfare state or the universal provision of  
53 medical care, are suggested to have been particularly influential in preventing natural  
54 selection from purging deleterious mutations in human populations [1, 2, 4, 5]. Consistent  
55 with this suggestion, recent comparative genomic analyses have revealed a greater incidence  
56 of genetic pathologies in western industrialised populations than in traditional, pre-industrial  
57 human societies which are more exposed to natural selection [4, 5, 7-9]. Nevertheless, it is  
58 impossible to demonstrate that a more benign physical and social environment, in which  
59 selection is relaxed, has *caused* this difference.

60

61 Elaborate architecture, enhanced access to resources and benevolent social behaviours are  
62 relatively commonplace in other animals too, especially among the many bird, mammal and

63 insect species that cooperate with each other and live socially [10]. For these species, any  
64 *causal* effects of this social and physical environment on genetic variation can more easily be  
65 investigated. A complication in other animal societies, however, is that additional factors  
66 might perturb the mutation-selection balance. For example, animals that breed cooperatively  
67 also tend to produce fewer, larger offspring. This life history strategy is known to reduce  
68 genetic diversity [11] and could potentially oppose, or even conceal, any increases in genetic  
69 variation that are due to cooperation buffering the effects of natural selection. Cooperative  
70 animal societies are also commonly associated with a high incidence of reproductive skew.  
71 Since only a few dominant individuals are typically able to reproduce, the effective  
72 population size is greatly reduced [12]. This can lead to a reduction in the efficiency of natural  
73 selection and a greater influence of genetic drift [6], potentially confounding any increases in  
74 genetic variation that are due solely to relaxed selection. Similarly, animal societies typically  
75 comprise related individuals that derive kin-selected benefits from their cooperative social  
76 interactions. Theoretical analyses have shown that kin selection acts more weakly than direct  
77 selection [13]. Consequently, loci under kin selection are predicted to harbour more sequence  
78 variation than loci under direct selection [3, 13].

79  
80 We tested the effect of kin-selected cooperative actions on the maintenance of genetic  
81 variation by focusing on parental care, a widespread form of cooperation [14]. Since care is  
82 commonly exhibited by pair-breeding individuals, this form of cooperation is unlikely to  
83 change effective population size – eliminating this potentially confounding effect. By building  
84 protective nests, defending their brood from attack and nourishing them, animal parents shield  
85 their young from environmental stressors [15] and weaken the correlation between the  
86 phenotypic variation seen by selection and the underlying genetic variation [3, 16]. In these  
87 ways, parents relax selection on the offspring phenotype [3, 15-18] theoretically allowing

88 mildly deleterious alleles to accumulate [3, 6, 15]. Previous experimental work with insects  
89 has shown that parental care relaxes selection sufficiently that new mutants [15] and inbred  
90 offspring [19] can survive - at least for one generation. However, it is not yet known whether  
91 parental care also enables mildly deleterious mutations to persist over multiple generations.

92

93 We tested this prediction by evolving replicate laboratory populations of burying beetles  
94 *Nicrophorus vespilloides* under sharply contrasting levels of parental care, for 20 generations.  
95 Comparing populations within species also allowed us to eliminate the confounding effect of  
96 propagule number on genetic diversity [11]. Burying beetles breed on the body of a small  
97 dead vertebrate [20], which the parents jointly convert into a carrion nest by removing the fur  
98 or feathers, rolling the flesh into a ball, covering it with anti-microbial anal exudates, and  
99 burying it. This is pre-hatching parental care [21]. Parents also guard and feed larvae after  
100 hatching, though larvae can survive in the lab with no post-hatching care at all [22]. In two of  
101 our evolving populations, larvae were able to receive both pre-hatching and post-hatching  
102 parental care (these were called the ‘Full Care’ lines) while in two other populations we  
103 prevented parents from supplying any post-hatching care by removing them before the larvae  
104 hatched, after the carrion nest was complete (these were called the ‘No Care’ lines). During  
105 the first 20 or so generations of experimental evolution, No Care lines rapidly adapted to a life  
106 without parental care [23], through divergent phenotypic change in both larval [e.g. 24]) and  
107 parental [21] traits.

108

109 To determine whether parental care causes deleterious genetic variation to accumulate over  
110 the generations, we inbred sub-populations, each derived from the replicate experimental  
111 evolving populations, for 8 successive generations (we called this The Evolutionary History

112 Experiment). For these 8 generations, we measured the extent to which inbreeding reduced  
113 measures of reproductive success in comparison with control outbred populations. To  
114 determine whether parental care could temper the rate of extinction (as implied by [19]), in  
115 half of all our treatments parents were allowed to provide care after their offspring hatched,  
116 while in the remainder they were prevented from supplying post-hatching care. This  
117 generated 8 different treatments in total (see Supplementary Figure 1, for the design of the  
118 Evolutionary History Experiment).

119  
120 We used the data from the Evolutionary History Experiment, to test three predictions: (1) that  
121 the No Care environment is harsher than the Full Care environment. (2) That the more benign  
122 conditions of the Full Care environment relax selection and promote the survival of more  
123 genetic variants. (3) That inbred populations from the Full Care lines should exhibit greater  
124 inbreeding depression than inbred populations from the No Care lines (having accumulated a  
125 greater number of deleterious recessive mutations under relaxed selection). The outbred  
126 populations acted as a control treatment for tests of all three predictions.

127

## 128 **Methods**

### 129 *Nicrophorus vespilloides* natural history.

130 The common burying beetle *N. vespilloides* breeds on a small dead vertebrate (like a songbird  
131 or mouse). The larvae hatch from eggs laid nearby in the soil and crawl to their carrion nest,  
132 which they can feed upon themselves [20]. Once at the carcass, larvae receive post-hatching  
133 biparental care. Parents supply fluids to their offspring through oral trophallaxis, and defend  
134 their brood and the carrion nest from attack by predators, microbes and rival beetles [20]. The  
135 duration and extent of post-hatching care are highly variable, however. For example, when

136 wild beetles are brought into the lab to breed, roughly 5% of larvae receive no post-hatching  
137 care at all, yet larvae can still survive to become reproductively competent adults (e.g. [22,  
138 25]. Within roughly a week of hatching, the larvae complete development and at this point  
139 (which we refer to as ‘dispersal), they start to crawl away from the scant remains of the  
140 carcass to pupate in the soil. The parents, meanwhile, fly off in search of a new carcass.

141

## 142 **Experimental evolution**

143 The experimental lines used in this work have been described in detail elsewhere [e.g. 21, 24].  
144 In brief, we established a large founding population of *N. vespilloides* by interbreeding wild-  
145 caught individuals from four different woodlands. This was then divided into four  
146 experimental lines. In two lines, larvae experienced ‘Full Care’ at each generation, with both  
147 parents staying in the breeding box throughout the breeding bout and able to provide post-  
148 hatching care as well as pre-hatching care. In the other two ‘No Care’ lines, parents engaged  
149 in pre-hatching care but at each generation they were removed from the breeding box around  
150 53 h after they were paired, so that they never interacted with their larvae. The work reported  
151 here began when these lines had been exposed to 20 generations of experimental evolution  
152 under these contrasting regimes of care.

153

## 154 **Evolutionary History Experiment**

### 155 **Preparatory common garden generation**

156 The experiment began by exposing individuals drawn from the four lines (Full Care replicated  
157 twice and No Care replicated twice) to a common garden Full Care environment for one  
158 generation (N = 60 pairs for each No Care line (to counter-balance the slightly lower breeding  
159 success caused by the No Care environment) and N = 50 pairs for each Full Care line). In this

160 way, we minimised any potentially confounding transgenerational effects prior to starting the  
161 Evolutionary History Experiment.

## 162 **Overview (see Supplementary Figure 1)**

163 Broods from the common garden generation were used to seed lineages in the experimental  
164 treatments: broods derived from the Full Care populations (FC<sub>POP</sub>) founded lineages that were  
165 Inbred or Outbred, in either a Full Care (FC<sub>ENV</sub>) or No Care (NC<sub>ENV</sub>) environment, and the  
166 same was true for broods derived from the No Care populations (NC<sub>POP</sub>). Thus, for each  
167 experimental line of origin, individuals in the different treatments came from a similar genetic  
168 pool. From Generation 1 onwards, half of the beetles drawn from each line were exposed to  
169 continuous inbreeding (full-sibling crosses) for up to 8 generations (by which point all the  
170 inbred lineages had gone extinct) (N = c. 45 crosses per treatment at Generation 1). The  
171 remaining beetles were outbred in identical conditions to provide a control baseline for  
172 comparison with the inbred lineages (N = c. 35-40 crosses per treatment, per generation). Half  
173 of all inbred lineages, and half of the outbreeding populations, were allowed to provide post-  
174 hatching care for their young (Full Care environment), while the remaining beetles were only  
175 allowed to provide pre-hatching care (No Care environment). The experiment therefore had a  
176 2 x 2 x 2 design, with 8 treatments in all (Full Care versus No Care line of origin; Inbred  
177 versus Outbred; Full Care environment versus No Care environment), with each treatment  
178 replicated twice due to replicate Full Care and No Care populations (Supplementary Figure  
179 1).

## 180 **Detailed methods**

181 Beetle maintenance was carried out following standard protocols [23]. Briefly, adult beetles  
182 were kept individually in plastic boxes (12 x 8 x 6cm) filled with moist soil and fed twice a  
183 week with raw beef mince. Adults were bred at 2-3 weeks post-eclosion in a breeding box (17



184 x 12 x 6cm) with soil and a mouse carcass (11-13 g for all treatments except for the  
185 individuals derived from the Full Care lines, that were outbred under Full Care conditions (8-  
186 14 g)). To ease the considerable burden of work, data for broods in this treatment were  
187 collected from the ongoing experimental evolution lines in the laboratory. Carcass size was  
188 included, where appropriate, as a factor in the statistical analyses (see below).

189 For the inbreeding treatments, we paired full siblings (one pair per family) whereas for the  
190 outbreeding treatments we paired males and females at random and did not pair siblings or  
191 cousins. Each pair was given a breeding box with a dead mouse sitting on soil, and the  
192 breeding boxes were placed in a dark cupboard to simulate natural underground conditions.

193 For broods assigned to a No Care environment, parents were removed around 53 h after  
194 pairing. Eight days after pairing (which is when the larvae have completed their development  
195 and start to disperse away from the carcass) we scored two standard measures of reproductive  
196 success in burying beetles [21]: brood success (fail = no larvae produced; success = some  
197 larvae produced) and brood size at dispersal. Larvae were then placed into cells (2 x 2 x 2cm)  
198 in an eclosion box (10 x 10 x 2cm), with one eclosion box per brood, which was filled with  
199 soil until larvae had developed into sexually immature adults (about 18 days after dispersal).

200 At this point, adults were transferred to individual boxes until they reached sexual maturity  
201 roughly 2 weeks later. Both the eclosion boxes and the individual boxes were kept on shelves  
202 in the laboratory at 21°C on a 16L:8D hour light cycle.

203

## 204 **Statistical Analyses**

205 All statistical tests were conducted in R version 3.5.1 [26]. Data handling and visualisation  
206 were carried out using the ‘tidyverse’ [27] and ‘survminer’ [28] R packages. All data and

207 code presented in the manuscript is available through: <https://github.com/r->  
208 mashoodh/nves\_MutationLoad.

209

### 210 *Testing predictions (1) and (2)*

211 To test predictions (1) and (2) we focused on the data collected from Generation 1. Using a  
212 binomial generalised linear model (GLM) in the base ‘statistics’ package in R, we tested the  
213 effect of evolutionary history (*i.e.* derived from a No Care evolving population or from a Full  
214 Care evolving population), current care environment (*i.e.* experienced No Care or Full Care  
215 during Generation 1), and inbreeding (*i.e.* inbred or outbred) on brood success. We defined  
216 brood success at dispersal in the following way: broods that produced at least one larva that  
217 survived to breed were defined as successful (following [21, 23]) whereas those that did not  
218 produce any surviving young were classified as failures.

219

220 We subsequently ran analyses separately for the inbreeding and outbreeding conditions to  
221 examine any interactions between evolutionary history (*i.e.* derived from a No Care evolving  
222 population (NC<sub>POP</sub>) or from a Full Care evolving population (FC<sub>POP</sub>)) and the current  
223 environment (*i.e.* experienced No Care (NC<sub>ENV</sub>) or Full Care (FC<sub>ENV</sub>) during Generation 1)  
224 dropping non-significant interaction terms where appropriate. We included block and carcass  
225 weight as covariates to ensure any effects we detected occurred over and above any variation  
226 in these variables.

227

### 228 *Testing prediction (3)*

229 *Calculation of inbreeding depression.*

230 For direct comparison with previous work [19], we calculated the inbreeding depression rate:

231  $\delta = (w_o - w_i)/w_o$ , where  $w_o$  and  $w_i$  are respectively the number of surviving outbred and  
232 inbred offspring at dispersal. We combined data from both blocks.

233

### 234 *Survival analysis across generations*

235 To determine the effect of evolutionary history (*i.e.* derived from a No Care evolving  
236 population or from a Full Care evolving population), and current care environment (*i.e.*  
237 experienced No Care or Full Care during Generation 1) on the survival of the different  
238 lineages in the Evolutionary History Experiment (Supplementary Figure 1), we fit accelerated  
239 time hazard models with a log-logistic distribution using the ‘survival’ R package [27]. Again  
240 carcass weight and block were included as covariates. A lineage was considered to be extinct  
241 if it did not survive to reproduce in the subsequent generation. We additionally used the non-  
242 parametric Kruskal Wallis test to determine if median survival times of each inbred lineage  
243 differed, by comparing the effect of evolutionary history (*i.e.* derived from a No Care  
244 evolving population or from a Full Care evolving population) in separate analyses, one for  
245 each current care environment (No Care versus Full Care). Model diagnostics were checked  
246 visually.

247

## 248 **Results**

249 To test predictions (1) and (2) we initially focused on the data collected from the first  
250 generation of breeding in the Evolutionary History Experiment. In support of prediction (1),  
251 we found that exposure to a No Care environment reduced reproductive success, regardless of  
252 the evolutionary history of the lineage (Figure 1, Table 1). However, in support of prediction  
253 (2), we found that a supply of post-hatching care enabled more broods to survive, even if they

254 were inbred - and regardless of the evolutionary history of their lineage (Figure 1, Table 1),  
255 replicating previous work [19].

256

257 To test prediction (3), we continued to examine inbred families in the first generation of  
258 breeding in the Evolutionary History Experiment. In this generation, we found an interaction  
259 between evolved history and the current environment in inbred but not outbred lineages  
260 (Table 2). We split the dataset by the current level of care supplied, to be able to examine the  
261 effect of evolutionary history in more detail. In support of prediction (3), we found inbred  
262 families derived from the Full Care populations had lower brood survival than inbred families  
263 drawn from the No Care populations ( $\log(\text{OR}) = 1.12 [0.49-1.80]$ ,  $z=3.42$ ,  $p<0.001$ ) – though  
264 only when broods were raised in a No Care current environment. No equivalent differences  
265 were observed in the Full Care current environment ( $\log(\text{OR})=0.20 [-1.4,1.9]$ ,  $z=0.25$ ,  
266  $p=0.80$ ). For the outbred families, the evolutionary history of the lineage had no effect on  
267 breeding success, though broods were in general less successful when they received no post-  
268 hatching care (Table 2).

269

270 To further test prediction (3), we expanded our analyses to consider all generations, beginning  
271 by calculating the extent of inbreeding depression at each generation. Inbreeding depression  
272 was greater in Generation 1 for families descended from the Full Care evolving populations  
273 than the No Care evolving populations, in the No Care current environment (Figure 2A). We  
274 found the same pattern in the Full Care current environment – though here the differences  
275 between lineages were first seen at Generation 3 (Figure 2A).

276

277 Finally, we compared the survival of all lines across generations in the Evolutionary History  
278 Experiment, by fitting accelerated failure time hazard models (Figure 2B). A lineage was  
279 considered extinct if none of its members survived to reproduce in the subsequent generation.  
280 Whilst all inbred lineages in our experiments eventually went extinct, outbred lineages were  
281 still reproducing successfully at the point at which the experiment was terminated  
282 (Supplementary Figure 2, Supplementary Table 2).

283 For the inbred lineages, there was once again an interaction between the evolutionary  
284 history of a population and current care received (Supplementary Table 1). This resulted, in  
285 part, from a No Care current environment causing particularly rapid extinction (Figure 2B;  
286 Supplementary Table 2). When there was No Care, inbred lineages seeded from the Full Care  
287 evolving populations had significant lower median survival than inbred lineages seeded from  
288 the No Care evolving populations (Estimate=0.20 [0.05-0.36],  $p<0.01$ ; Figure 2B). Lineages  
289 seeded from the Full Care evolving populations reached 50% extinction one generation  
290 sooner under a No Care environment than inbred lineages seeded from the No Care evolving  
291 populations (non-parametric Kruskal Wallis test:  $H(1)=4.59$ ,  $p=0.03$ ; Supplementary Table 2).  
292 In a Full Care environment, by contrast, we could detect no equivalent difference in lineage  
293 survival between the No Care and Full Care populations (Estimate=-0.01 [-0.13-0.10],  
294  $p=0.85$ ; Figure 2B; Supplementary Table 2).

295

## 296 **Discussion**

297 Burying beetles care for their offspring by making a nest for them to inhabit during  
298 development, providing them with plentiful carrion to feed upon and defending them from  
299 attack by rival microbes and animals [20]. Our experiments show that the supply of post-  
300 hatching care is sufficient to perturb the mutation-selection balance by relaxing selection - as  
301 predicted generally by evolutionary theory [1-5]. We cannot tell from our experiments

302 whether selection is relaxed because the primary beneficiaries of care are kin [3] or because  
303 parental care more generally buffers against harsh environments and so weakens the effects of  
304 natural selection [14], or both.

305

306 By supplying care, parents shield their young from relatively harsh environmental conditions:  
307 larvae receiving parental care had higher survival than those that had no care. Indeed, we  
308 found that when parents provided care, the developmental environment was sufficiently  
309 benign, and the strength of selection then sufficiently weak, that diverse genetic variants were  
310 able to survive - even those that were inbred, just as previous work has shown [19].

311 Consequently, after 20 generations of experimental evolution in these contrasting  
312 environments, we found that the Full Care populations carried a greater mutation load than  
313 the No Care populations (confirmed in a companion paper [29] which uses SNPs to quantify  
314 the extent of genetic variation in the two types of experimental population). The difference  
315 between the populations was especially pronounced during the first generation of inbreeding,  
316 and most readily detectable when inbred individuals were prevented from supplying care.

317 This suggests that some of the additional mutations present in the Full Care populations were  
318 recessive and / or only mildly deleterious [5]. Given the relatively short timeframe of this  
319 experiment, we presume that these mutations were present in the founding populations of  
320 wild-caught beetles but were removed from the No Care populations by selection acting more  
321 strongly against them. In this sense, our findings are similar to previous work on *Tribolium*  
322 which found that deleterious genetic variation was purged when populations were exposed  
323 experimentally to more intense sexual selection [30].

324

325 Although it is now well-understood why individuals evolve cooperative behaviour, the  
326 mechanisms that cause cooperation to persist and diversify remain relatively unclear [31].

327 Recent theoretical work suggests that positive feedback cycles could play a key role in  
328 entrenching cooperation, following its initial evolution [32]. Cooperative social interactions  
329 facilitate the transfer of beneficial microbes, for example, upon which social partners might  
330 then become dependent over evolutionary time, ensuring that cooperation must persist [e.g.  
331 33-36]. Likewise, cooperative interactions can promote the division of labour between social  
332 partners, causing a degree of interdependence that ensures cooperation must continue [37].  
333 Our results, together with those obtained by Pilakouta et al. [19], suggest a third mechanism  
334 through which cooperation can become entrenched, hinted at originally by Crow [2]. We have  
335 shown that parental care creates a problem (increased mutation load: our results) for which it  
336 is also the solution (enhanced survival of all genetic variants: [19], our results). By relaxing  
337 selection, parental care causes an increase mutation load which increases the population's  
338 dependence upon care. Care ensures that the diverse genetic variants, whose existence it has  
339 facilitated, are able survive until the end of development. This could explain why parental  
340 care has evolved more frequently than it has been evolutionarily lost [14]. As Crow [2] put it:  
341 'there is no turning back...A return to the original conditions leads to the immediate full  
342 impact of all the mutants that have accumulated during the period of improved environment".  
343 In principle, this reasoning can be extended to any form of cooperation that relaxes selection.  
344 Indeed, Crow [2] made the argument originally in the context of environmental improvements  
345 in human societies and their effect on genetic variation.  
346  
347 Finally, we have focused on the immediate effects of parental care on genetic variation, but  
348 the longer-term consequences are still unclear and need not match the effects seen in the  
349 short-term. For example, although greater intensity of intrasexual selection is beneficial in the  
350 short term, because it purges deleterious mutations from the population [30], in the longer run  
351 more intense intrasexual selection can make lineages more prone to extinction [38]. This

352 might be due to a lack of beneficial genetic diversity. Likewise, although parental care  
353 enables mildly deleterious mutations to persist in the short-term, perhaps in the longer-term it  
354 builds up genetic diversity that could be beneficial and underpin rapid evolution, especially if  
355 environmental conditions change suddenly, or if mutations promote novelty through  
356 compensatory evolution [26]. In future work, it would be interesting to isolate the longer-term  
357 effects of parental care on genetic diversity and the effects it might have on the evolutionary  
358 resilience of wild populations in a changing world [39].



359 **References**

- 360 1. Wright, S. 1960. On the number of self-incompatibility alleles maintained in  
361 equilibrium by a given mutation rate in a population of a given size: a reexamination.  
362 *Biometrics* **16**, 61-85.
- 363 2. Crow JJ. 1966 The quality of people: Human evolutionary changes. *BioScience* **16**,  
364 863-867.
- 365 3. Linksvayer TA, Wade MJ. 2009 Genes with social effects are expected to harbor more  
366 sequence variation within and between species. *Evolution* **63**, 1685-1696.
- 367 4. Lynch M. 2016. Mutation and human exceptionalism: Our future genetic load.  
368 *Genetics* **202**, 869-875. (doi: 10.1534/genetics.115.180471)
- 369 5. Kondrashov A. 2017 *Crumbling Genome: The impact of deleterious mutations on*  
370 *human populations*. Wiley Online Library 2017.
- 371 6. Baer CF, Miyamoto MM, Denver DR. 2007 Mutation rate variation in multicellular  
372 eukaryotes: causes and consequences. *Nat. Rev. Gen.* **8**, 619-631  
373 (doi:10.1038/nrg2158)
- 374 7. You W, Henneberg H. 2017 Cancer incidence increasing globally: The role of relaxed  
375 natural selection. *Evol. Appl.* **11**, 140-152. (doi: [10.1111/eva.12523](https://doi.org/10.1111/eva.12523)).
- 376 8. Aris-Brosou S. 2019 Direct evidence of an increasing mutational load in humans. *Mol.*  
377 *Biol. Evol* **36**, 2823-2829. (doi: 10.1093/molbev/msz192)
- 378 9. Saniotis A, Hennberg M, Mohammadi K. 2021 Genetic load and biological changes to  
379 extant humans. *J. Biosoc. Sci.* **53**, 639-642. (doi: 10.1017/S0021932020000413)
- 380 10. Davies NB, Krebs JR, West SA. 2012 *An Introduction to Behavioural Ecology*  
381 (Wiley-Blackwell, Oxford).
- 382 11. Romiguier J, Gayrai P, Ballenghien M, Bernard A, Cahais V, Chenuil A, Chiari Y,  
383 Dernat R, Faivre N, Loire E et al. 2014 Comparative population genomics in animals

- 384 uncovers the determinants of genetic diversity. *Nature* **515**, 261-263.  
385 (doi:10.1038/nature13685)
- 386 12. Rubinstein DR, Ågren JA, Carbone L, Elde NC, Hoekstra HE, Kapheim KM, Keller  
387 L, Moreau CS, Toth AL, Yeaman A et al. 2019 Coevolution of genomic architecture  
388 and social behavior. *Trends Ecol. Evol.* **34**, 844-855. (doi:10.1016/j.tree.2019.04.011)
- 389 13. Linksvayer TA, Wade MJ. 2016 Theoretical predictions for sociogenomic data: the  
390 effects of kin selection and sex-limited expression on the evolution of social insect  
391 genomes. *Front. Ecol. Evol.* **4**, 65 (doi: 10.3389/fevo.2016.00065)
- 392 14. Royle NJ, Smiseth PT, Kölliker M. 2012 *The Evolution of Parental Care* (Oxford  
393 University Press, Oxford).
- 394 15. Snell-Rood EC, Burger M, Hutton Q, Moczek AP. 2016 Effects of parental care on the  
395 accumulation and release of cryptic genetic variation: review of mechanisms and a  
396 case study of dung beetles. *Evol. Ecol.* **30**, 251-265. (doi: 10.1007/s10682-015-9813-  
397 4)
- 398 16. Wade MJ 1998. The evolutionary genetics of maternal effects. pp 5-21 In *Maternal*  
399 *Effects as Adaptations* (eds Mousseau TA, Fox C. Oxford University Press, Oxford  
400 1998).
- 401 17. Whitlock MC 1996. The red queen beats the jack-of-all trades: the limitations on the  
402 evolution phenotypic plasticity and niche breadth. *Am. Nat.* **148**, S65-S77.  
403 (doi:10.1086/285902).
- 404 18. Van Dyken JD, Wade MJ 2010. The genetic signature of conditional expression.  
405 *Genetics* **184**, 557–570.
- 406 19. Pilakouta N, Jamieson S, Moorad JA, Smiseth PT. 2015. Parental care buffers against  
407 inbreeding depression in burying beetles. *Proc. Natl. Acad. Sci. U.S.A.* **112**, 8031-  
408 8035 (doi:10.1073/pnas.1500658112)

- 409 20. Scott MP. 1998 The ecology and behavior of burying beetles. *Annu. Rev. Entomol.* **43**,  
410 595–618 (doi: 10.1146/annurev.ento.43.1.595).
- 411 21. Duarte A, Rebar D, Hallett AC, Jarrett BJM, Kilner RM. 2021 Evolutionary change in  
412 the construction of the nursery environment when parents are prevented from caring  
413 for their young directly. *Proc. Natl. Acad. Sci. U.S.A.* **48**, e2102450118. (doi:  
414 10.1073/pnas.2102450118)
- 415 22. Eggert AK, Reinking M, Müller JK. 1998 Parental care improves offspring survival  
416 and growth in burying beetles. *Anim. Behav.* **55**, 97–107. (doi:  
417 10.1006/anbe.1997.0588)
- 418 23. Schrader M, Jarrett BJM, Kilner RM. 2015 Using experimental evolution to study  
419 adaptations for life within the family. *Am. Nat.* **185**, 610-619 (doi: [10.1086/680500](https://doi.org/10.1086/680500))
- 420 24. Rebar D, Bailey NW, Jarrett BJM, Kilner RM. 2020 An evolutionary switch from  
421 sibling rivalry to sibling cooperation, caused by a sustained loss of parental care. *Proc.*  
422 *Natl. Acad. Sci. U.S.A.* **117**, 2544-2550. (doi: 10.1073/pnas.1911677117)
- 423 25. Jarrett BJM, Evans E, Haynes HB, Leaf MR, Rebar D, Duarte A, Schrader M, Kilner  
424 RM. 2018 A sustained change in the supply of parental care causes adaptive evolution  
425 of offspring morphology. *Nature Comms* **9**, 1-8 (doi: 10.1038/s41467-018-06513-6).
- 426 26. Farkas Z, Kovács K, Sarkadi Z, Kalapis D, Fekete G, Birtyik F, Ayaydin F, Molnár C,  
427 Horváth P, Pál C, Papp, B. 2022 Gene loss and compensatory evolution promotes the  
428 emergence of morphological novelties in budding yeast. *Nature Ecol. Evol.* **6**, 763-773  
429 (doi: 10.1038/s41559-022-01730-1).
- 430 27. Therneau T 2021. A Package for Survival Analysis in R. R package version 3.2-  
431 13, <URL: <https://CRAN.R-project.org/package=survival>>.

- 432 28. Kassambara A, Kosinski M, Biecek P. 2021 survminer: Drawing Survival Curves  
433 using 'ggplot2'. R package version 0.4.9. [https://CRAN.R-](https://CRAN.R-project.org/package=survminer)  
434 [project.org/package=survminer](https://CRAN.R-project.org/package=survminer)
- 435 29. Mashoodh R, Trowsdale AT, Manica A, Kilner RM. 2023 Parental care drives the  
436 evolution of molecular genetic variation.  
437 <https://www.biorxiv.org/content/10.1101/2023.01.09.523216v1>
- 438 30. Lumley AJ, Michalczyk L, Kitson JJN, Spurgin LG, Morrison CA, Godwin JL,  
439 Dickinson ME, Martin OY, Emerson BC, Chapman T, Gage MJG 2015. Sexual  
440 selection protects against extinction. *Nature* **522**, 470-473. (doi: 10.1038/nature14419)
- 441 31. West SA, Cooper GA, Ghoul MB, Griffin AS 2021. Ten recent insights for our  
442 understanding of cooperation. *Nature Ecol. Evol.* **5**, 419-430. (doi: 10.1038/s41559-  
443 020-01384-x)
- 444 32. Franz M, Schülke, Ostner J. 2013 Rapid evolution of cooperation in group-living  
445 animals. *BMC Evolutionary Biology* **13**, 235 (doi:10.1186/1471-2148-13-235).
- 446 33. Nalepa CA, Bignell DE, Bandi C. 2001 Detritivory, coprophagy, and the evolution of  
447 digestive mutualisms in Dictyoptera. *Insectes Sociaux* **48**, 194-201  
448 (doi:10.1007/PL00001767).
- 449 34. Lombardo MP. 2008 Access to mutualistic endosymbiotic microbes: an  
450 underappreciated benefit of group living. *Behav. Ecol. Sociobiol.* **62**, 479-497. (doi:  
451 10.1007/s00265-007-0428-9)
- 452 35. Ezenwa VO, Archie EA, Craft ME, Hawley DM, Martin LB, Moore J, White L. 2016  
453 Host behaviour – parasite feedback: an essential link between animal behaviour and  
454 disease ecology. *Proc. R. Soc. B.* **283**, 20153078. (doi: 10.1098/rspb.2015.3078)
- 455 36. Dillard J, Benbow ME. 2020 From symbionts to societies: how wood resources have  
456 shaped insect sociality. *Front Ecol. Evol.* **8**, 173 (doi: 10.3389/fevo.2020.00173)
- 457

- 458 37. Cooper GA, West SA. 2018 Division of labour and the evolution of extreme  
459 specialisation. *Nature Ecol. Evol.* **2**, 1161-1167. (doi:10.1038/s41559-018-0564-9)
- 460 38. Martins MJF, Puckett TM, Lockwood R, Swaddle JP, Hunt G. 2018 High male sexual  
461 investment as a driver of extinction in fossil ostracods. *Nature* **556**, 366-369  
462 (doi:10.1038/s41586-018-0020-7).
- 463 39. Balmford A. 1996 Extinction filters and current resilience: the significance of past  
464 selection pressure for conservation biology. *Trends Ecol. Evol.* **11**, 193-196. (doi:  
465 10.1016/0169-5347(96)10026-4)
- 466

467 **Acknowledgements**

468 We thank Sue Aspinall and Chris Swannack for helping with beetle maintenance. We also  
469 thank Benjamin Jarrett and Darren Rebar for collecting data from the experimental evolution.

470 **Funding statement:** This project was supported by a Consolidator's Grant from the European  
471 Research Council (310785 Baldwinian\_Beetles), by a Wolfson Merit Award from the Royal  
472 Society, The Leverhulme Trust (RPG-2018-232) and The Isaac Newton Trust (18.23(q)), each  
473 to RMK. RM was supported by a Biotechnology and Biological Sciences Research Council  
474 Future Leaders Fellowship (BB/R01115X/1). HS was partially supported by the Japan Society  
475 for the Promotion of Science (KAKENHI Grant Number: JP19K21569).

476 **Author contributions:** Conceived the idea and designed the Evolutionary History  
477 Experiment: RMK, SP; Performed the Evolutionary History Experiment: SP; Collected data  
478 from Experimentally evolving populations: RM; Analysed the data: RM, HS; Wrote the  
479 manuscript: RMK, RM. All authors discussed the results and commented on the manuscript.

480 **Competing interests:** The authors declare no competing financial or nonfinancial interests.

481 **Data and materials availability:** Data and code needed to evaluate the conclusions in the  
482 paper are available from [https://github.com/r-mashoodh/nves\\_MutationLoad](https://github.com/r-mashoodh/nves_MutationLoad).

483

484 **TABLES**

485 **Table 1.** Summary of binomial generalised linear model estimates for brood success in all  
 486 treatments in Generation 1 of the Evolutionary History Experiment, predicted by the type of  
 487 population in which they Evolved (*i.e.* whether families were derived from the No Care or  
 488 Full Care evolving populations), Current Environment (*i.e.* whether families experienced No  
 489 Care or Full Care in the current generation) and Breeding Condition (*i.e.* whether families  
 490 were inbred or outbred). Carcass weight and Block were included as a covariate for inbred  
 491 lineages (see Supplementary Figure 1 for experimental design).

| Characteristic           | log(HR) <sup>1</sup> | 95% CI <sup>1</sup> | p-value          |
|--------------------------|----------------------|---------------------|------------------|
| Evolved                  |                      |                     |                  |
| Full Care                | —                    | —                   |                  |
| No Care                  | -0.05                | -0.40, 0.30         | 0.8              |
| CurrentEnv               |                      |                     |                  |
| Full Care                | —                    | —                   |                  |
| <b>No Care</b>           | <b>-1.4</b>          | <b>-1.7, -1.0</b>   | <b>&lt;0.001</b> |
| Breeding                 |                      |                     |                  |
| inbred                   | —                    | —                   |                  |
| <b>outbred</b>           | <b>0.33</b>          | <b>0.10, 0.56</b>   | <b>0.006</b>     |
| as.numeric(Block)        | -0.02                | -0.24, 0.20         | 0.9              |
| Carcass.weight           | 0.12                 | -0.01, 0.25         | 0.10             |
| Evolved * CurrentEnv     |                      |                     |                  |
| <b>No Care * No Care</b> | <b>0.48</b>          | <b>0.02, 0.93</b>   | <b>0.042</b>     |

<sup>1</sup>HR = Hazard Ratio, CI = Confidence Interval

493 **Table 2** Summary of binomial generalised linear model estimates for brood success in  
 494 Generation 1 of the Evolutionary History Experiment, with Inbred and Outbred populations  
 495 analysed separately. For each analysis we tested whether brood success was predicted by the  
 496 type of population in which they Evolved (*i.e.* whether families were derived from the No  
 497 Care (NC<sub>POP</sub>) or Full Care (FC<sub>POP</sub>) evolving populations) and Current Environment (*i.e.*  
 498 whether families experienced No Care (NC<sub>ENV</sub>) or Full Care (FC<sub>ENV</sub>) in the current generation).  
 499 Carcass weight and Block were included as covariates (see Supplementary Figure 1 for  
 500 experimental design). Separate models were run for Inbred and Outbred families.

501

| Characteristic           | Inbred               |                     |                  | Outbred              |                     |                  |
|--------------------------|----------------------|---------------------|------------------|----------------------|---------------------|------------------|
|                          | log(HR) <sup>1</sup> | 95% CI <sup>1</sup> | p-value          | log(HR) <sup>1</sup> | 95% CI <sup>1</sup> | p-value          |
| Evolved                  |                      |                     |                  |                      |                     |                  |
| Full Care                | —                    | —                   |                  | —                    | —                   |                  |
| No Care                  | 0.08                 | -0.38, 0.54         | 0.7              | -0.13                | -0.71, 0.45         | 0.7              |
| CurrentEnv               |                      |                     |                  |                      |                     |                  |
| Full Care                | —                    | —                   |                  | —                    | —                   |                  |
| <b>No Care</b>           | <b>-1.7</b>          | <b>-2.2, -1.3</b>   | <b>&lt;0.001</b> | <b>-0.92</b>         | <b>-1.4, -0.43</b>  | <b>&lt;0.001</b> |
| as.numeric(Block)        | -0.09                | -0.40, 0.22         | 0.6              | 0.11                 | -0.21, 0.45         | 0.5              |
| Carcass.weight           | 0.20                 | -0.05, 0.45         | 0.13             | 0.05                 | -0.13, 0.22         | 0.7              |
| Evolved * CurrentEnv     |                      |                     |                  |                      |                     |                  |
| <b>No Care * No Care</b> | <b>0.64</b>          | <b>0.02, 1.3</b>    | <b>0.043</b>     | 0.25                 | -0.46, 0.97         | 0.5              |

<sup>1</sup>HR = Hazard Ratio, CI = Confidence Interval

502

503



504 **FIGURES**

505 **Figure 1**

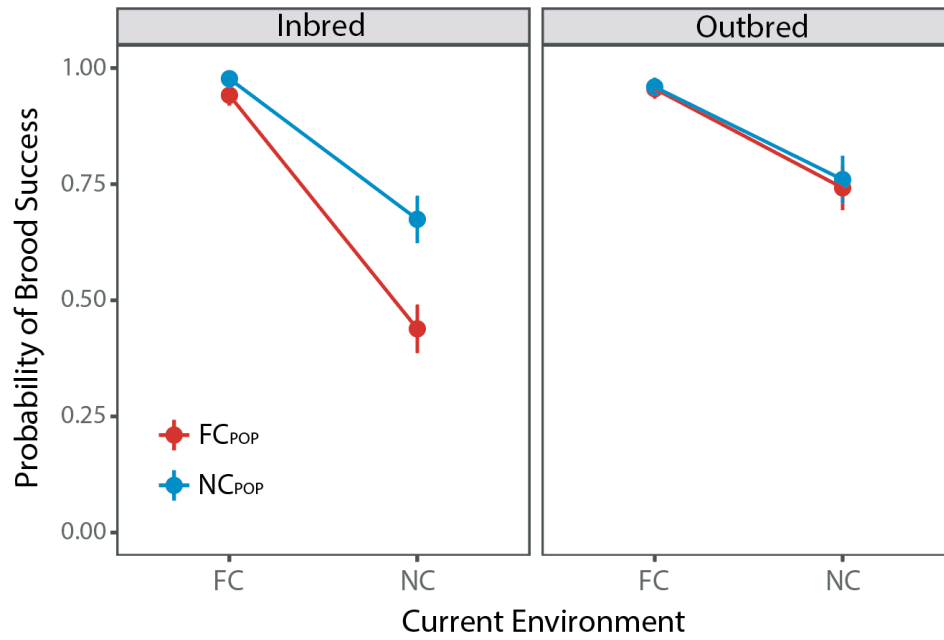

506

507 **Figure 1. Breeding success of evolved populations in Generation 1 of the Evolutionary**  
508 **History Experiment.** Predicted means  $\pm$  S.E brood survival probabilities in populations that  
509 have evolved under Full Care (red lines and datapoints, FC<sub>POP</sub>) or No Care (blue lines and  
510 datapoints NC<sub>POP</sub>) are shown, based on the current care environment (Full Care vs No Care)  
511 under inbred (left) and outbred (right) conditions.

512

513 **Figure 2**

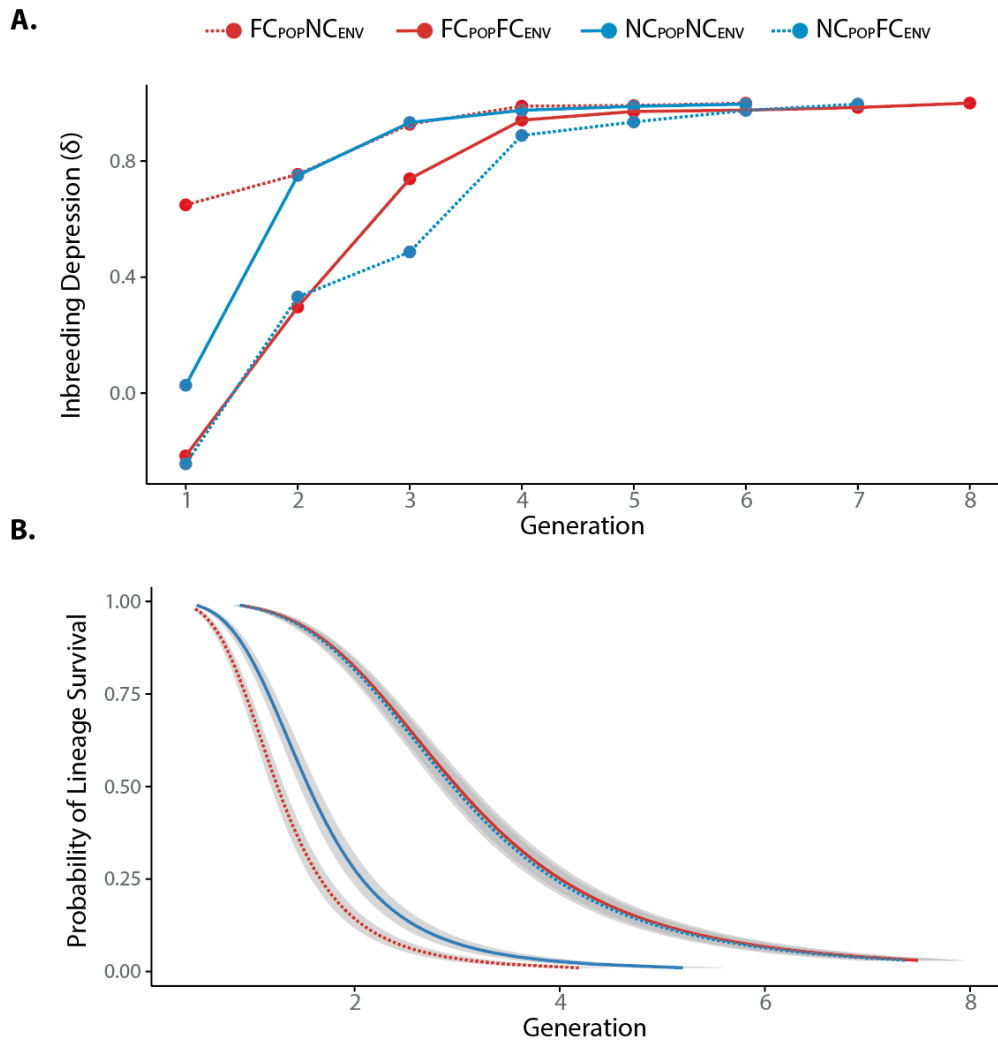

514

515 **Figure 2. Survival of inbred populations across generations.**

516 **A.** Inbreeding depression values for population lineages from the Evolutionary History

517 Experiment, shown in their native (FC<sub>POP</sub>FC<sub>ENV</sub> and NC<sub>POP</sub>NC<sub>ENV</sub>) and reciprocal current

518 environments (FC<sub>POP</sub>NC<sub>ENV</sub> and NC<sub>POP</sub>FC<sub>ENV</sub>). **B.** Survival curves for inbred population

519 lineages from the Evolutionary History Experiment and associated 95% confidence intervals

520 for the inbred lines, also shown in their native (FC<sub>POP</sub>FC<sub>ENV</sub> and NC<sub>POP</sub>NC<sub>ENV</sub>) and reciprocal

521 current environments (FC<sub>POP</sub>NC<sub>ENV</sub> and NC<sub>POP</sub>FC<sub>ENV</sub>). (FC = Full Care, NC = No Care).

522
